# Supplementary material for: Further investigation of confirmed urinary tract infection (UTI) in children under five years: a systematic review
Source: Springer Nature journal article supplement (doi:10.1186/1471-2431-5-2), 2005-03-15
Supplement: Additional file 2 [file 1471-2431-5-2-s2.doc]

## Additional Table 2. Results of quality assessment

| **Study details** | **Spectrum composition** | **Selection criteria** | **Disease progression bias** | **Partial verification bias** | **Differential verification bias** | **Incorporation bias** | **Test execution details** | **Reference execution details** | **Test review bias** | **Diagnostic review bias** | **Clinical review bias** | **Uninterpretable results** | **Withdrawals** |
| --- | --- | --- | --- | --- | --- | --- | --- | --- | --- | --- | --- | --- | --- |
| Alzen(1994)58 | - | - | + | + | + | + | - | - | ? | ? | ? | ? | ? |
| Andrich(1992)16 | - | - | ? | + | + | + | - | - | ? | ? | + | ? | - |
| Baronciani(1986)47 | + | - | ? | + | + | + | + | - | + | + | + | ? | - |
| Barry(1998)81 | ? | - | + | + | + | + | + | + | + | + | ? | + | + |
| Benador(1994)17 | - | + | + | + | + | + | + | + | + | + | ? | ? | ? |
| Bergius(1989)59 | - | - | + | + | + | + | + | - | ? | ? | ? | ? | ? |
| Berrocal(2001)60 | - | + | + | + | + | + | + | + | + | + | ? | + | + |
| Biggi(2001)18 | + | + | ? | + | + | + | - | + | + | ? | ? | ? | - |
| Bircan(1995)19 | + | - | + | + | + | + | - | + | + | + | ? | + | + |
| Boudailliez(1998)20 | - | + | + | + | + | + | - | - | ? | ? | ? | ? | ? |
| Buyan(1993)36 | + | + | + | + | + | + | + | + | ? | ? | ? | ? | ? |
| Bykov(2003)34 | + | - | + | + | + | + | + | + | + | + | ? | + | + |
| Capa Kaya(2001)45 | + | - | + | + | + | + | + | + | + | + | ? | ? | ? |
| De Sadeleer(1994)74 | - | - | + | + | + | + | + | + | + | ? | + | ? | ? |
| Evans(1999)48 | - | + | + | + | + | + | + | - | ? | ? | ? | ? | ? |
| Everaert(1998)37 | - | + | ? | + | + | + | + | + | ? | ? | ? | + | ? |
| Foresman(2001)49 | - | + | ? | - | + | + | + | - | + | ? | ? | ? | - |
| Fretzayas(2000)38 | + | + | + | + | + | + | - | + | ? | + | ? | ? | ? |
| Frutos(2000)61 | - | - | + | + | + | + | + | + | + | ? | ? | + | + |
| Gervaix(2001)40 | + | + | + | + | + | + | + | + | + | + | ? | + | ? |
| Girona(1995)21 | + | + | ? | + | + | + | - | + | ? | ? | ? | ? | - |
| Gordon(1992)87 | + | - | ? | + | + | + | + | + | + | + | ? | + | + |
| Guermazi(1993)22 | - | - | + | + | + | + | - | - | ? | ? | ? | ? | - |
| Haberlick(1997)62 | - | + | + | + | + | + | + | - | + | + | ? | ? | + |
| Hajjar(2002)23 | - | + | + | + | + | + | + | + | ? | ? | ? | ? | ? |
| Hedman(1978)75 | + | - | + | + | + | + | - | - | ? | ? | ? | ? | ? |
| Hitzel(2002)24 | - | + | ? | + | + | + | + | + | + | + | ? | ? | + |
| Hitzel(2000)25 | - | + | ? | + | + | + | - | - | + | + | ? | ? | + |
| Ilyas(2002)26 | - | + | + | + | + | + | - | + | ? | ? | ? | + | + |
| Jakobsson(1992)27 | - | + | + | + | + | + | + | - | ? | ? | ? | ? | - |
| Jantausch(1994)44 | + | + | ? | + | + | + | + | - | ? | ? | ? | + | + |
| Jequier(1998)28 | + | + | + | + | + | + | + | + | + | + | ? | + | + |
| Kessler(1982)63 | - | - | ? | + | + | + | + | - | + | + | ? | ? | ? |
| Krzemien(2002)29 | + | + | + | + | + | + | - | - | ? | ? | ? | ? | ? |
| Landau(1994)39 | - | + | ? | + | + | + | + | + | ? | ? | + | ? | + |
| Landau(1994)43 | - | - | ? | + | + | + | - | - | ? | ? | ? | ? | ? |
| Lavocat(1997)30 | + | + | + | + | + | + | + | + | ? | ? | ? | ? | + |
| LeQuesne(1986)82 | - | - | ? | + | + | + | - | - | + | + | ? | ? | ? |
| MacKenzie(1994)83 | + | + | + | + | + | + | + | + | ? | ? | ? | ? | - |
| Mage(1989)50 | + | + | + | + | + | + | - | - | + | ? | ? | + | ? |
| Mahant(2002)51 | - | + | ? | + | + | + | + | + | ? | ? | + | ? | + |
| McEwing(2002)72 | - | - | + | + | + | + | + | + | + | + | ? | + | + |
| McLorie(1980)78 | - | + | + | + | + | + | + | + | + | + | - | ? | ? |
| Mentzel(2002)64 | - | + | + | + | + | + | + | + | + | + | ? | + | + |
| Merrick(1980)79 | - | - | + | + | + | + | - | - | + | + | + | ? | ? |
| Moorthy(2004)95 | + | - | + | + | + | + | + | + | ? | ? | ? | ? | ? |
| Morin(1999)31 | - | + | + | + | + | + | + | + | + | + | ? | ? | ? |
| Mucci(1994)84 | - | - | ? | + | + | + | - | - | ? | ? | ? | ? | ? |
| Muensterer(2002)52 | - | + | + | + | + | + | + | - | ? | ? | ? | + | ? |
| Muro(2002)35 | + | - | + | + | + | + | + | - | ? | ? | ? | ? | - |
| Nakamura(2002)71 | - | - | + | + | + | + | + | + | - | - | ? | ? | ? |
| Oostenbrink(2000)53 | + | + | ? | + | + | + | - | - | ? | ? | ? | ? | ? |
| Piaggio(2003)65 | - | + | ? | + | + | + | + | - | ? | ? | ? | + | ? |
| Pickworth(1992)80 | - | - | - | ? | + | + | - | - | ? | ? | + | ? | - |
| Prat(2003)46 | + | - | + | + | + | + | + | - | ? | ? | ? | ? | ? |
| Radmayr(2002)66 | - | + | + | + | + | + | + | - | + | + | ? | + | + |
| Rohden(1995)67 | - | - | ? | + | + | + | + | - | ? | ? | ? | ? | ? |
| Salih(1994)54 | - | + | + | + | + | + | + | - | + | + | ? | ? | ? |
| Scherz(1994)85 | - | + | ? | + | + | + | + | + | ? | ? | ? | ? | - |
| Schneider(1984)68 | - | + | + | + | + | + | + | - | ? | ? | ? | ? | ? |
| Sfakianakis(1989)32 | + | - | ? | + | + | + | - | - | ? | ? | ? | ? | - |
| Siamplis(1996)69 | - | + | + | + | + | + | + | - | ? | ? | ? | ? | + |
| Smolkin(2002)41 | + | + | + | + | + | + | - | - | + | ? | ? | + | + |
| Sreenarasimhalah(1995)33 | + | + | + | + | + | + | - | + | ? | ? | ? | ? | - |
| Stokland(1996)77 | + | + | - | + | + | + | - | + | + | + | + | + | - |
| Stokland(1996)42 | + | + | + | + | + | + | - | + | + | + | ? | + | + |
| Stokland(1998)76 | + | + | - | + | + | + | + for DMSA - for others | + | + | + | ? | + | - |
| Tan(1988)55 | + | + | ? | - | ? | + | + | - | + | ? | ? | ? | - |
| Trave(1997)56 | + | - | + | + | + | + | - | + for DMSA - for MCUG | ? | ? | ? | ? | - |
| Uhl(2003)73 | - | - | + | + | + | + | + | + | - | - | ? | ? | ? |
| Valentini(2001)70 | - | + | + | + | + | + | + | + | + | + | ? | + | + |
| Verber(1988)57 | + | - | ? | - | + | + | + | + | ? | ? | ? | ? | - |
